# Supplementary material
Source: PubMed Central journal article supplement (PMC3127602)
Supplement: supp_77_11_3809__1.pdf [file supp_77_11_3809__1.pdf]

1 Table S1 Bacterial strains and plasmids used in this study

| Strains or plasmids                         | Relevant characteristics <sup>a</sup>                                                                                                           | Reference or source |
|---------------------------------------------|-------------------------------------------------------------------------------------------------------------------------------------------------|---------------------|
| <b>Strains</b>                              |                                                                                                                                                 |                     |
| <i>Escherichia coli</i>                     |                                                                                                                                                 |                     |
| DH5 $\alpha$                                | F <sup>-</sup> $\Phi$ 80 <i>lacZ</i> $\Delta$ M15 $\Delta$ ( <i>lacZYA-argF</i> )U169 <i>endA1 deoR recA1</i>                                   | Clontech            |
| BI21 (DE3)                                  | <i>hsdR17</i> (r <sub>K</sub> <sup>-</sup> m <sub>K</sub> <sup>+</sup> ) <i>phoA supE44</i> $\lambda$ <sup>-</sup> <i>thi-l gyrA96 relA1</i>    | Novagen             |
| <i>X. oryzae</i> pv. <i>oryzae</i>          |                                                                                                                                                 |                     |
| PXO99 <sup>A</sup>                          | 5-azacytidine resistant, race 6                                                                                                                 | (21)                |
| P $\Delta$ <i>hrpF</i>                      | PXO99 <sup>A</sup> <i>hrpF</i> knock-out mutant, Rif <sup>r</sup>                                                                               | This lab            |
| P $\Delta$ <i>hpa2</i>                      | PXO99 <sup>A</sup> <i>hpa2</i> knock-out mutant, Rif <sup>r</sup>                                                                               | This lab            |
| P $\Delta$ <i>hpa2</i> $\Delta$ <i>hrpF</i> | PXO99 <sup>A</sup> <i>hpa2</i> and <i>hrpF</i> double knock-out mutant, Rif <sup>r</sup>                                                        | This lab            |
| P $\Delta$ <i>hrcV</i>                      | PXO99 <sup>A</sup> <i>hrcV</i> knock-out mutant, Rif <sup>r</sup>                                                                               | This lab            |
| <i>X. oryzae</i> pv. <i>oryzicola</i>       |                                                                                                                                                 |                     |
| RS105                                       | Wild type, Rif <sup>r</sup> , Chinese race 2                                                                                                    | This lab            |
| R $\Delta$ <i>hrpX</i>                      | RS105 <i>hrpX</i> knock-out mutant, Rif <sup>r</sup>                                                                                            | This lab            |
| R $\Delta$ <i>hrpG</i>                      | RS105 <i>hrpG</i> knock-out mutant, Rif <sup>r</sup>                                                                                            | This lab            |
| R $\Delta$ <i>hrcV</i>                      | RS105 <i>hrcV</i> knock-out mutant, Rif <sup>r</sup>                                                                                            | This lab            |
| R $\Delta$ <i>hrpF</i>                      | RS105 <i>hrpF</i> knock-out mutant, Rif <sup>r</sup>                                                                                            | This lab            |
| R $\Delta$ <i>hpa2</i>                      | RS105 <i>hpa2</i> knock-out mutant, Rif <sup>r</sup>                                                                                            | This study          |
| R $\Delta$ <i>hrpD6</i>                     | RS105 <i>hrpD6</i> knock-out mutant, Rif <sup>r</sup>                                                                                           | (18)                |
| R $\Delta$ <i>hpa2</i> $\Delta$ <i>hrpF</i> | RS105 <i>hpa2</i> and <i>hrpF</i> double knock-out mutant, Rif <sup>r</sup>                                                                     | This study          |
| CR $\Delta$ <i>hpa2</i>                     | R $\Delta$ <i>hpa2</i> containing pCR <i>hpa2</i> , Rif <sup>r</sup> , Km <sup>r</sup>                                                          | This study          |
| <b>Yeast</b>                                |                                                                                                                                                 |                     |
| AH109                                       | MATa, <i>trp1-901</i> , <i>leu2-3, 112</i> , <i>ura3-52</i> , <i>His3-200</i> , <i>gal4</i> , <i>gal80</i> , <i>LYS2::GAL1UAS-GAL1TATA-His3</i> | Clontech            |
| <i>Agrobacterium tumefaciens</i>            |                                                                                                                                                 |                     |
| GV3101                                      | Gent <sup>r</sup>                                                                                                                               | This lab            |
| <b>Plasmids</b>                             |                                                                                                                                                 |                     |
| pMD18-T                                     | pUC <i>ori</i> , cloning vector, Ap <sup>r</sup>                                                                                                | Takara              |
| pZWavrXa10                                  | <i>avrXa10</i> fused to <i>lacZ</i> promoter of pBluescript II KS(+), Ap <sup>r</sup>                                                           | (57)                |
| pMD $\Delta$ 28AvrX10                       | pMD18-T containing <i>avrXa10</i> lacking the first 28 amino acids, Ap <sup>r</sup>                                                             | This lab            |
| pUFR034                                     | <i>IncW</i> , <i>Mob(p)</i> , <i>Mob<sup>+</sup></i> , <i>LacZa<sup>+</sup></i> , PK2 replicon, cosmid, Km <sup>r</sup>                         | (10)                |
| pKMS1                                       | Suicide vector derivative from pK18mobGII, <i>sacB<sup>+</sup></i> , Km <sup>r</sup>                                                            | (27)                |
| pA-GFP                                      | pUC18-backbone, pUC <i>ori</i> , Ap <sup>r</sup>                                                                                                | This lab            |
| pET41a (+)                                  | pBR322 origin, F1 origin, <i>lacI</i> , His-Tag, S-Tag, Km <sup>r</sup>                                                                         | Novagen             |
| pET30a (+)                                  | pBR322 origin, f1 origin, <i>lacI</i> , His-Tag, S-Tag, GST-tag, Km <sup>r</sup>                                                                | Novagen             |
| 1301-YN                                     | derived from pCambia1301 which encodes the N-terminal portion of YFP, Km <sup>r</sup>                                                           | This lab            |
| 1301-YC                                     | derived from pCambia1301 which encodes the C-terminal portion of YFP, Km <sup>r</sup>                                                           | This lab            |
| pGADT-7                                     | <i>GAL4</i> (768-881) AD, <i>LEU2</i> , HA epitope tag, Ap <sup>r</sup>                                                                         | Clontech            |
| pGBKT-7                                     | <i>GAL4</i> (1-147) BD, <i>TRP1</i> , c-myc epitope tag, Km <sup>r</sup>                                                                        | Clontech            |
| pGADT7-T                                    | SV40 large T-antigen(84-708) in pGADT-7, <i>LEU2</i> , Ap <sup>r</sup>                                                                          | Clontech            |
| pGBKT7-53                                   | Murine p53(72-390) in pGBKT-7, <i>TRP1</i> , Km <sup>r</sup>                                                                                    | Clontech            |
| pGBKT7-Lam                                  | Human lamin C(66-230) in pGBKT-7, <i>TRP1</i> , Km <sup>r</sup>                                                                                 | Clontech            |
| pA <i>HrpF</i>                              | pGADT-7 containing <i>hrpF</i> , Ap <sup>r</sup>                                                                                                | This study          |
| pB <i>HrpF</i>                              | pGBKT-7 containing <i>hrpF</i> , Km <sup>r</sup>                                                                                                | This study          |
| pK $\Delta$ <i>hpa2</i>                     | pKMS1 containing the fusion of the upstream and downstream homologous fragments of <i>hpa2</i> , Km <sup>r</sup>                                | This study          |
| pK $\Delta$ <i>hrpF</i>                     | pKMS1 containing the fusion of the upstream and downstream homologous fragments of <i>hrpF</i> , Km <sup>r</sup>                                | This study          |
| p $\Delta$ 28AvrX10                         | pUFR034 expressing <i>avrXa10</i> lacking the first 28 amino acids with its own promoter, Km <sup>r</sup>                                       | This lab            |
| pAvrXa10                                    | pUFR034 expressing AvrXa10 with a FLAG tag, Km <sup>r</sup>                                                                                     | This lab            |
| p <i>hpa2</i> GUS                           | pUFR034 containing the <i>hpa2</i> promoter region- <i>gusA</i> fusion                                                                          | This study          |

|             |                                                                                   |            |
|-------------|-----------------------------------------------------------------------------------|------------|
|             | fragment, Km <sup>r</sup>                                                         |            |
| pCRhpa2     | pUFR034 expressing Hpa2 with its own promoter, Km <sup>r</sup>                    | This study |
| pCRhrpF     | pUFR034 expressing HrpF with its own promoter, Km <sup>r</sup>                    | This study |
| pAHpa2      | pGADT-7 expressing Hpa2, Ap <sup>r</sup>                                          | This study |
| pBHpa2      | pGBKT-7 expressing Hpa2, Km <sup>r</sup>                                          | This study |
| pHpa2-YN    | 1301-YN expressing Hpa2, Km <sup>r</sup>                                          | This study |
| pHrpF-YC    | 1301-YC expressing HrpF, Km <sup>r</sup>                                          | This study |
| pHpa2-GFP   | pA-GFP expressing Hpa2, Ap <sup>r</sup>                                           | This study |
| pHpa2-c-Myc | pUFR034 expressing Hpa2 with c-Myc tag with <i>hpa2</i> promoter, Km <sup>r</sup> | This study |
| pHrpF-c-Myc | pET30a (+) expressing HrpF, c-Myc-tagged, Km <sup>r</sup>                         | This study |
| pGST-Hpa2   | pET41a (+) expressing Hpa2, GST-tagged, Km <sup>r</sup>                           | This study |

1 <sup>a</sup> Ap<sup>r</sup> = ampicillin resistance, Km<sup>r</sup> = kanamycin resistance, Rif<sup>r</sup> = rifampicin resistance, Gent<sup>r</sup> = Gentamycin  
 2 resistance  
 3 <sup>b</sup> the location of amino acids.

## 1 Table S2 Primers used in this study

| Primers             | Sequence (5'→3'; restriction sites underlined)                                                                         | Description                                                     |
|---------------------|------------------------------------------------------------------------------------------------------------------------|-----------------------------------------------------------------|
| hpa2I-F/hpa2I-R     | <u>CCCGGGAGTGCAGCAACTGGTGGTGCAC/</u><br><u>GGATCCCGCAAGTGATCCTGCAGGGATG</u>                                            | The left homologous fragment for <i>hpa2</i> knock-out, 421 bp  |
| hpa2II-F/hpa2II-R   | <u>GGATCCGTTTCGTTACCTCGATCTCGATTG/</u><br><u>TCTAGATCTGCGCCTGGAGAATCTCTCCGA</u>                                        | The right homologous fragment for <i>hpa2</i> knock-out, 692 bp |
| hrpFI-F/hrpFI-R     | <u>TAGGATCCATGTCGCTCAACATGCTTTTCTA/</u><br><u>TAGAGCTCGACCCCTCCAGCGCCGGCGGCGC</u>                                      | The left homologous fragment for <i>hrpF</i> knock-out, 751 bp  |
| hrpFII-F/hrpFII-R   | <u>TAGAGCTCGACACTGCGATTCAAGGTGGCGA/</u><br><u>TAGCATGCATTGCCAGGATGTCGATGCTCCCG</u>                                     | The right homologous fragment for <i>hrpF</i> knock-out, 426 bp |
| phpa2-F/phpa2-R     | <u>TATGAATTCAGAGGGGGAAGTGAAAAAT/</u><br><u>TATAAGCTTGTTTCGTTACCTCGATCTC</u>                                            | <i>hpa2</i> promoter region, 216 bp                             |
| gusA-F/gusA-R       | <u>ATAAAGCTTTTACGTCTGTAGAAAACCC/</u><br><u>TAAGAATTCATTGTTTGCCTCCCTGCTG</u>                                            | <i>gusA</i> gene, 1831 bp                                       |
| hpa2-F1/hpa2-R1     | <u>ATGGATCCATGATCAATTCAACGGT/</u><br><u>TATGAATTCCTATTCTCCAATCACACCA</u>                                               | <i>hpa2</i> gene, 564 bp                                        |
| hrpF-F1/hrpF-R1     | <u>TATCATATGTCGCTCAACATGCTTTCTACC/</u><br><u>AATCATATGTTATCTGCGACGTATCCTGACA</u>                                       | <i>hrpF</i> gene, 2406 bp                                       |
| hpa2-F2/hpa2-R2     | <u>ATGGATCCATGATCAATTCAACGGT/</u><br><u>TATCTCGAGCTATTCTCCAATCACACCA</u>                                               | <i>hpa2</i> gene, 564 bp                                        |
| hpa2-F3/hpa2-R3     | <u>ATGGATCCATGATCAATTCAACGGT/</u><br><u>TATGGTACCTTCTCCAATCACACCA</u>                                                  | <i>hpa2</i> gene without the stop codon, 561 bp                 |
| hpa2-F4/hpa2-R4     | <u>TTACTCGAGATGATCAATTCAACGGTCGCA/</u><br><u>ATAGTCGACTTCTCCAATCACACCACGCCTT</u>                                       | <i>hpa2</i> gene without the stop codon, 561 bp                 |
| Hpa2-F/Hpa2Myc-R    | <u>TTAGAATTCGATAACAGATCCGCGGGGCGT/</u><br><u>TATGGTACCCTAAGCGTAATCTGGAACATCGT</u>                                      | <i>hpa2</i> gene (c-Myc tagged) and its promoter region, 780 bp |
| hrpF2-F/hrpF-R2     | <u>ATGGGTATTACCAATCACACCAG</u><br><u>TATTCTAGATCGCTCAACATGCTTTCTACC/</u><br><u>AATGGATCCTCTGCGACGTATCCTGACA</u>        | <i>hrpF</i> gene without the stop codon, 2406 bp                |
| HrpFMyc-F/HrpFMyc-R | <u>TTACATATGATGTCGCTCAACATGCTTT/</u><br><u>TATGATATCTTACAGATCTTCTTCAGAAATAAG</u><br><u>TTTTTGTTCTCTGCGACGTATCCTGAC</u> | <i>hrpF</i> gene (c-Myc-tagged), 2439 bp                        |

2

3

4

5

6
